# Supplementary material for: Concurrent contamination of Free-Living Amoebae and Legionella pneumophila in water resources of hospitals, A microscopic and molecular analysis
Source: Research Square preprint supplement (doi:10.21203/rs.3.rs-6205801/v1), 2025-04-02
Supplement: Supplementary file 1 [file dbcf2a5fcfda8e917b70203c.docx]

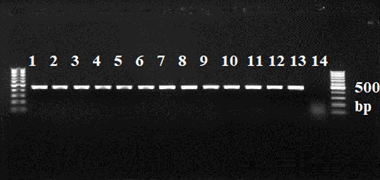


**Figure 2.** Electrophoresis of the PCR product using specific primers for *Acanthamoeba* using the *mip* gene sequence isolated from hospital water sources in Birjand city.

(M: JDP1,2 Marker, Line 1-12: positive samples, Line13: PC positive control, and Line14: NC negative control)
